# Supplementary material for: Label-free fluorescent catalytic biosensor for highly sensitive and selective detection of the ferrous ion in water samples using a layered molybdenum disulfide nanozyme coupled with an advanced chemometric model
Source: Royal Society of Chemistry journal article supplement (doi:10.1039/c5an02457a), 2016-01-01
Supplement: c5an02457a1.pdf [file c5an02457a1.pdf]

SUPPLEMENTARY INFORMATION for ANALYST

## Electronic Supplementary Information

### **Label-Free Fluorescent Catalytic Biosensor for Highly Sensitive and Selective Detection of Ferrous Ion in Water Samples Using Layered Molybdenum Disulfide Nanozyme Coupled with an Advanced Chemometric Model**

*Jie Hu,<sup>a</sup> Qianfen Zhuang,<sup>a</sup> Yong Wang<sup>\*a</sup> and Yongnian Ni<sup>\*ab</sup>*

<sup>a</sup> College of Chemistry, Nanchang University, Nanchang, Jiangxi 330031, China

<sup>b</sup> State Key Laboratory of Food Science and Technology, Nanchang University, Nanchang, Jiangxi  
330047, China

---

\* Corresponding author. Tel: +86 791 83969500. Fax: +86 791 83969500.

E-mail address: wangyong@ncu.edu.cn and ynni@ncu.edu.cn

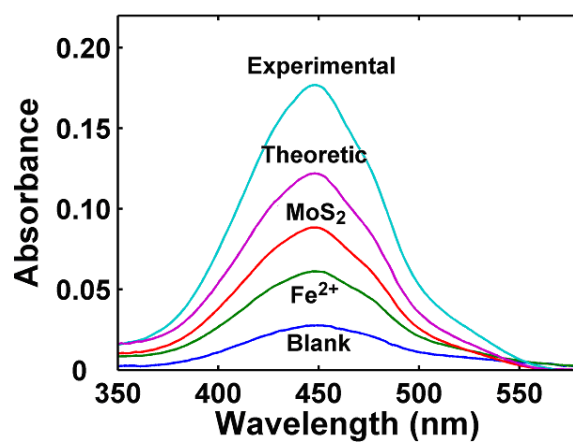

**Fig. S1** UV-Vis absorption spectra of the OPD/H<sub>2</sub>O<sub>2</sub> system (blank), the MoS<sub>2</sub>/OPD/H<sub>2</sub>O<sub>2</sub> system, the Fe<sup>2+</sup> OPD/H<sub>2</sub>O<sub>2</sub> system, as well as the theoretic and experimental spectra of the MoS<sub>2</sub>/OPD/H<sub>2</sub>O<sub>2</sub> system and the Fe<sup>2+</sup> OPD/H<sub>2</sub>O<sub>2</sub>. Condition: Fe<sup>2+</sup>, 0.10 μM; MoS<sub>2</sub>, 1.0 μg mL<sup>-1</sup>; OPD, 0.5 mM; H<sub>2</sub>O<sub>2</sub>, 0.1 mM; pH, 4.5, reaction time, 30 min.

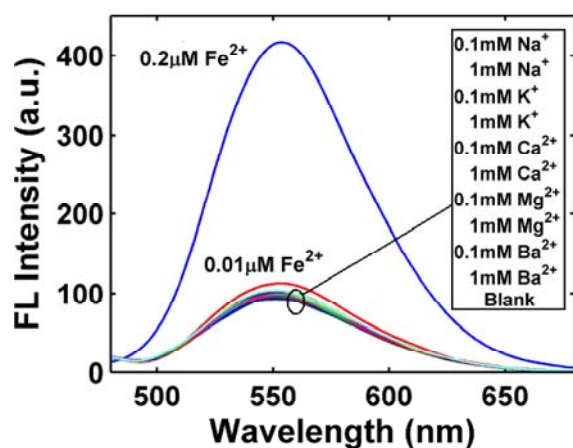

**Fig. S2** Fluorescence spectra of the MoS<sub>2</sub>/OPD/H<sub>2</sub>O<sub>2</sub> system with different individual metal ions (Ba<sup>2+</sup>, Mg<sup>2+</sup>, Ca<sup>2+</sup>, K<sup>+</sup>, or Na<sup>+</sup>).

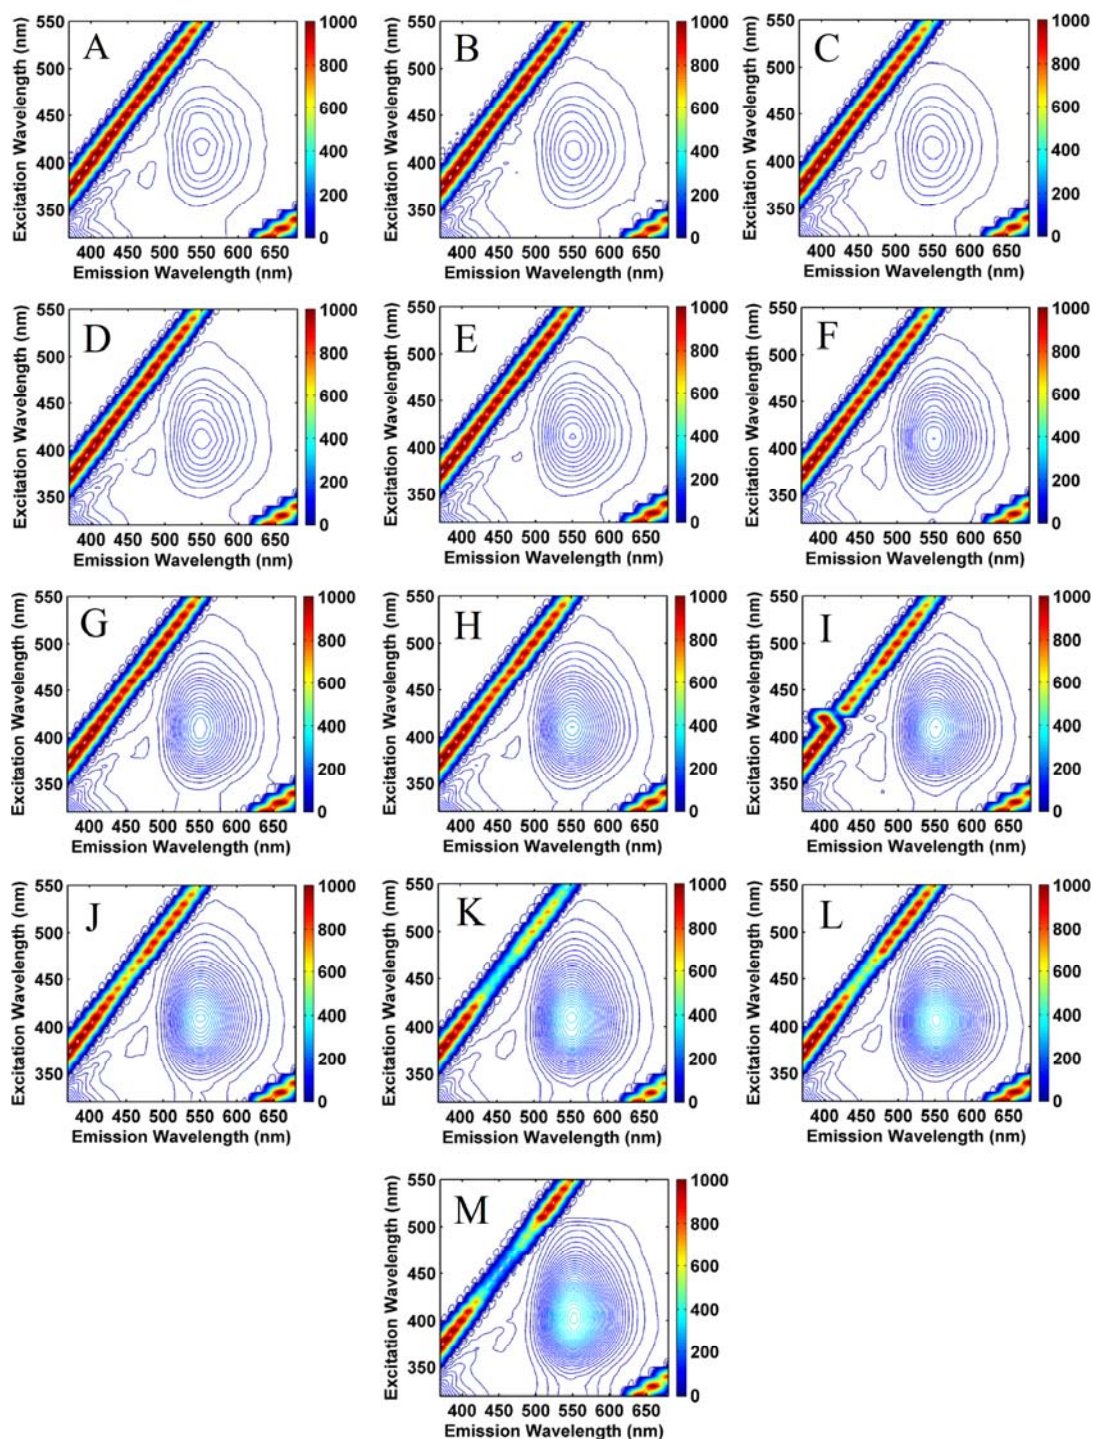

**Fig. S3** Contour map of the fluorescence excitation–emission matrix data of the calibration samples for the MoS<sub>2</sub>/OPD/H<sub>2</sub>O<sub>2</sub> biosensory system in the presence of different concentrations (μM) of Fe<sup>2+</sup>, (A) 0, (B) 0.005, (C) 0.01, (D) 0.02, (E) 0.04, (F) 0.06, (G) 0.08, (H) 0.10, (I) 0.12, (J) 0.14, (K) 0.16, (L) 0.18, (M) 0.20.

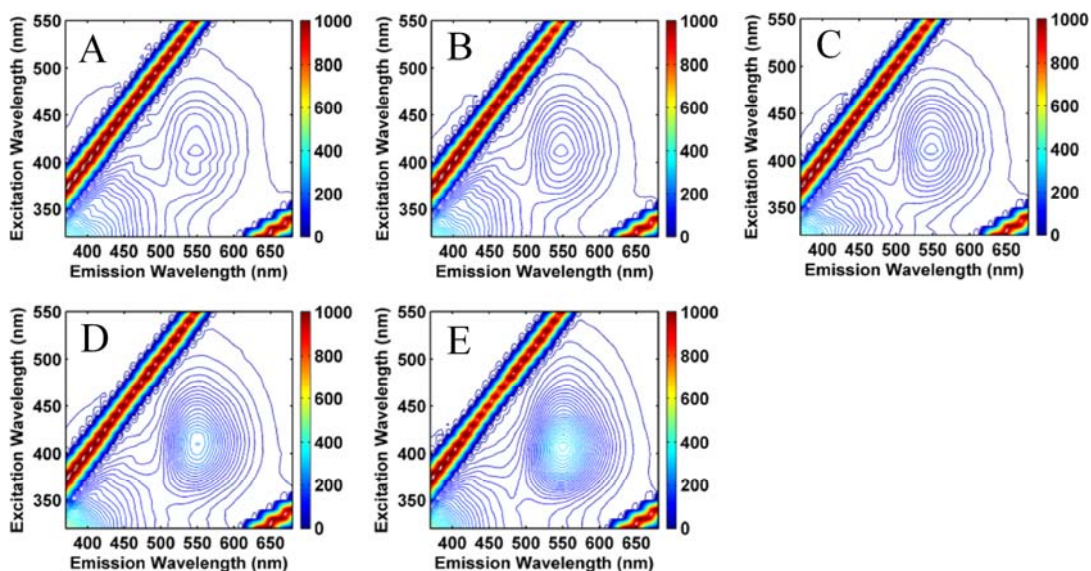

**Fig. S4** Contour map of the fluorescence excitation–emission matrix data of water samples for the MoS<sub>2</sub>/OPD/H<sub>2</sub>O<sub>2</sub> biosensory system in the presence of different concentrations (μM) of Fe<sup>2+</sup>, (A) 0, (B) 0.03, (C) 0.06, (D) 0.09, (E) 0.15.

**Table S1.** Determination of Fe<sup>2+</sup> in water samples (*n*=3).

| Samples | Added (μM) | Mean found (μM)    | Mean found (μM)    | Recovery (%) <sup>[a]</sup> | CV (%)             |
|---------|------------|--------------------|--------------------|-----------------------------|--------------------|
|         |            | by proposed method | by standard method | by proposed method          | by proposed method |
| 1       | 0          | 0.007              | 0.010              | —                           | —                  |
| 2       | 0.030      | 0.040              | 0.038              | 110                         | 2.5                |
| 3       | 0.060      | 0.062              | 0.066              | 92                          | 1.6                |
| 4       | 0.090      | 0.099              | 0.102              | 102                         | 6.1                |
| 5       | 0.150      | 0.150              | 0.158              | 95                          | 4.7                |

<sup>[a]</sup> Recovery (%) = 100 × (*c*<sub>mean found</sub>/*c*<sub>added</sub>).
